# Supplementary material
Source: Research Square preprint supplement (doi:10.21203/rs.3.rs-10065058/v1)
Supplement: Supplementary file 1 [file f9f6340b055d7db426743528.docx]

**Supplementary Material – Model Technical Details**

**S1. Model Architecture and Implementation**

The automated diagnosis and classification model for aortic dissection (AD) was developed based on a cascaded segmentation strategy using the VB-Net architecture.

The pipeline employed two sequential VB-Net models. The first stage was dedicated to segmenting the aorta, and the second stage utilized the results from the first stage as prior information to achieve precise segmentation of the intimal structures.

**VB-Net Architecture Overview:** VB-Net is an advanced 3D convolutional neural network adapted from the V-Net. Its design incorporates bottleneck modules within a U-Net-like encoder-decoder framework to enhance feature representation efficiency and gradient flow. The network consists of a contracting (encoding) path to capture contextual information and a symmetric expanding (decoding) path for precise localization, connected via skip connections to preserve spatial details. The encoding path includes an input block followed by four downsampling blocks to extract high-level features, while the decoding path mirrors this structure with four upsampling blocks and an output block to reconstruct the segmentation map.

Specifically, the input block consists of a 3D convolutional layer (kernel size 3×3×3, stride 1×1×1), followed by batch normalization and a ReLU activation function. The output block contains a convolutional module, a global average pooling layer, and a Softmax layer for voxel-wise classification. Each downsampling and upsampling block comprises a convolutional or deconvolutional module, respectively, along with multiple bottleneck modules. These bottleneck components enhance feature refinement and information flow within each block, contributing to the model’s overall performance and accuracy.

**S2. Model Development and Training Protocol**

The model was developed and initially tested on a retrospective cohort separate from the prospective validation cohort reported in the main study. The development set included 857 patients (84 Stanford Type A AD, 379 Type B AD, 394 negative cases). An independent test set comprised 516 patients (78 Type A, 121 Type B, 317 negative cases).

Model implementation was carried out in Python using PyTorch 1.7.0. Training was performed for 1000 epochs with a batch size of 32, using the Adam optimizer with an initial learning rate of 1×10⁻⁴. The best-performing model was selected when the training loss stabilized over 100 consecutive epochs.

All development and training experiments were conducted on a workstation equipped with an NVIDIA GeForce RTX 2080 Ti GPU (12 GB memory).

| **Supplementary Table S1** Scanning and reconstruction parameters.   | Parameter Category | Specific Parameter | Settings/Range | | --- | --- | --- | | Contrast Agent | Type | Iodinated contrast agent | |  | Concentration | ≥350 mg iodine/mL | |  | Dose | 1.0–1.2 mL/kg | |  | Injection Flow Rate | 4–5 mL/s | | Scanning Parameters | Tube voltage | BMI ≥30 kg/m²：120 kV  BMI 20–30 kg/m²：100 kV  BMI ≤20 kg/m²：80 kV | |  | Tube current | scanner’s exposure control system | |  | pitch factor | 0.984–0.992 | |  | Scan slice thickness | 5 mm | |  | Reconstruction slice thickness | 0.625 mm | | Radiation Dose | CTDIvol | 3.81–28.98 mGy | |  | DLP | 207.98–2095.28 mGy·cm | | Window Settings | Window Level | 40–55 HU | |  | Window Width | 350 HU |   **Supplementary Table S2** Performance analysis in diagnosing AD among subgroups of different ages, and genders. | | | | | | |
| --- | --- | --- | --- | --- | --- | --- | --- | --- | --- | --- | --- | --- | --- | --- | --- | --- | --- | --- | --- | --- | --- | --- | --- | --- | --- | --- | --- | --- | --- | --- | --- | --- | --- | --- | --- | --- | --- | --- | --- | --- | --- | --- | --- | --- | --- | --- | --- | --- |
|  | | AI Diagnosis | |  | | |
| Subgroup | Golden Standard | Negative N(%) | Positive N(%) | Total N(%) | Sensitivity (95%CI) | Specificity (95%CI) |
| Age |  |  |  |  |  |  |
| ≤60 years | Negative | 90(39.65) | 3(1.32) | 93(40.97) | 100.00(97.21, 100.00) | 96.77(90.94, 98.90) |
|  | Positive | 0 | 134(59.03) | 134(59.03) |  |  |
|  | Total | 90(39.65) | 137(60.35) | 227(100) |  |  |
| >60 years | Negative | 101(66.89) | 0 | 101(66.89) | 98.00(89.50, 99.65) | 100.00(96.34, 100.00) |
|  | Positive | 1(0.66) | 49(32.45) | 50(33.11) |  |  |
|  | Total | 102(67.55) | 49(32.45) | 151(100) |  |  |
| Gender |  |  |  |  |  |  |
| Male (%) | Negative | 113(42.01) | 2(0.74) | 115(42.75) | 99.35(96.41, 99.89) | 98.26(93.88, 99.52) |
|  | Positive | 1(0.37) | 153(56.88) | 154(57.25) |  |  |
|  | Total | 114(42.38) | 155(57.62) | 269(100) |  |  |
| Female (%) | Negative | 78(71.56) | 1(0.92) | 79(72.48) | 100.00(88.65, 100.00) | 98.73(93.17, 99.78) |
|  | Positive | 0 | 30(27.52) | 30(27.52) |  |  |
|  | Total | 78(71.56) | 31(28.44) | 109(100) |  |  |

AD, aortic dissection; AI, artificial intelligence.


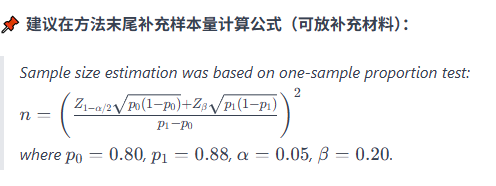
**Supplementary Picture S1** The sample size calculation
